# Supplementary material for: Ionospheric and thermospheric response to the 27–28 February 2014 geomagnetic storm over north Africa
Source: Copernicus journal article supplement (doi:10.5194/angeo-36-987-2018), 2018-07-12
Supplement: Supplementary file 1 [file angeo-36-987-2018-supplement.zip]

Archive with 2 entries (2 files):
- picasso04_mor_20140227_6300movie.avi
- angeo-36-987-2018-supplement-title-page.pdf
