# Supplementary material for: Ionospheric and thermospheric response to the 27–28 February 2014 geomagnetic storm over north Africa
Source: Copernicus journal article supplement (doi:10.5194/angeo-36-987-2018), 2018-07-12
Supplement: Supplementary file 1 [file angeo-36-987-2018-supplement.zip › angeo-36-987-2018-supplement-title-page.pdf]

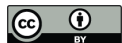

## *Supplement of*

# **Ionospheric and thermospheric response to the 27–28 February 2014 geomagnetic storm over north Africa**

**Khalifa Malki et al.**

*Correspondence to:* Khalifa Malki ([malki.khalifa@gmail.com](mailto:malki.khalifa@gmail.com))

- [angeo-36-987-2018-supplement-title-page.pdf](#)
- [picasso04\\_mor\\_20140227\\_6300movie.avi](#)

The copyright of individual parts of the supplement might differ from the CC BY 4.0 License.
